# Supplementary material
Source: HighWire-hosted journal article supplement (https://spcare.bmj.com/content/6/3/276)
Supplement: inline-supplementary-material-1 [file inline-supplementary-material-1.pdf]

## SUPPLEMENTARY MATERIAL

### CHARACTERISTICS OF INCLUDED STUDIES AND RISK OF BIAS TABLES

| <b>Study Characteristics: Batterham 2001</b> |                                                                                                                                                                                                                                                                                                                                                                                                                                                                             |
|----------------------------------------------|-----------------------------------------------------------------------------------------------------------------------------------------------------------------------------------------------------------------------------------------------------------------------------------------------------------------------------------------------------------------------------------------------------------------------------------------------------------------------------|
| <b>Methods</b>                               | Randomized control trial, not blinded, no placebo                                                                                                                                                                                                                                                                                                                                                                                                                           |
| <b>Participants</b>                          | 15 HIV positive patients<br>a) 5 participants, mean age 42, 100% male<br>b) 6 participants (5 completed), mean age 48, 100% male<br>c) 4 participants, mean age 46, 100% male                                                                                                                                                                                                                                                                                               |
| <b>Interventions</b>                         | 3 arm trial<br>a) Dietary counseling<br>b) Nandrolone decanoate (100mg/ fortnight intramuscular injection)<br>c) Megestrol acetate (400mg/day oral)                                                                                                                                                                                                                                                                                                                         |
| <b>Outcomes</b>                              | Weight<br>Appetite (10 point visual analogue scale)<br>LBM (measurement published: fat free mass by bioelectrical impedance analysis)<br>Plus: dietary intake                                                                                                                                                                                                                                                                                                               |
| <b>Notes</b>                                 | Length of treatment: 12 weeks<br>Quality score: 2<br>Data request: raw data provided by author<br>Cachexia criteria: unintentional weight loss >5% usual body weight despite adequate nutritional intake for > 1 month<br>Dropout rate: 20%<br>Time of analysis: 12 weeks (14 patients)<br>5 patients receiving dietary advice then went on to receive either ND (3) or MA (2). Not included in analysis as neither of the 2 patients whom received MA completed the trial. |

| <b>Risk of Bias: Batterham 2001</b>                       |                           |                                                                                         |
|-----------------------------------------------------------|---------------------------|-----------------------------------------------------------------------------------------|
| <b>Bias</b>                                               | <b>Authors' judgement</b> | <b>Support for judgement</b>                                                            |
| Random sequence generation (selection bias)               | Unclear risk              | No information given. Matched baseline characteristics.                                 |
| Allocation concealment (selection bias)                   | Unclear risk              | No information given                                                                    |
| Blinding of participants and personnel (performance bias) | Low risk                  | Not blinded - however not possible as Nandrolone deconate (ND) is given as IM injection |
| Blinding of outcome assessment (detection bias)           | Low risk                  | Not blinded - however not possible as Nandrolone deconate (ND) is given as IM injection |
| Incomplete outcome data (attrition bias)                  | Low risk                  | Only 1 dropout - pain at injection site (ND group).                                     |
| Selective reporting (reporting bias)                      | High risk                 | Unclear why results at 24 weeks not published. Raw data provided by author.             |
| Other bias                                                | Low risk                  | Matched baseline characteristics. No funding from industry.                             |

| <b>Study Characteristics: Gołębiewska 2012</b> |                                                                                                                                                                                                                                                                                                                                                                                                   |
|------------------------------------------------|---------------------------------------------------------------------------------------------------------------------------------------------------------------------------------------------------------------------------------------------------------------------------------------------------------------------------------------------------------------------------------------------------|
| <b>Methods</b>                                 | Clinical trial (open trial), not randomized                                                                                                                                                                                                                                                                                                                                                       |
| <b>Participants</b>                            | 32 end stage renal failure on dialysis (peritoneal or haemodialysis), mean age 70, 56% male                                                                                                                                                                                                                                                                                                       |
| <b>Interventions</b>                           | Megestrol acetate (160mg/day oral)                                                                                                                                                                                                                                                                                                                                                                |
| <b>Outcomes</b>                                | Weight<br>HRQOL: modified Hospital Anxiety and Depression Score (HADS), Purpose In Life test (PIL test), Cantril's Ladder, Brief Fatigue Inventory (BFI). HADS used in analysis.<br>Serum albumin<br>Plus: nutritional scores                                                                                                                                                                     |
| <b>Notes</b>                                   | Length of treatment: up to 6 months (open trial). Mean length of treatment 3.5 months<br>Data request: raw data provided by author<br>Cachexia criteria: serum albumin $\leq$ 3.8g/dL<br>Drop out rate: open trial<br>Time of analysis: 1 month (32 patients), 2 months (26), 3 months (18), 4 months (14), 5 months (12), 6 months (12)<br>Data used: 2 month data (3 month data used for HRQOL) |

| <b>Risk of Bias: Gołębiewska 2012</b>                     |                           |                                                                                                                                                                            |
|-----------------------------------------------------------|---------------------------|----------------------------------------------------------------------------------------------------------------------------------------------------------------------------|
| <b>Bias</b>                                               | <b>Authors' judgement</b> | <b>Support for judgement</b>                                                                                                                                               |
| Random sequence generation (selection bias)               | High risk                 | Non-randomized trial                                                                                                                                                       |
| Allocation concealment (selection bias)                   | High risk                 | Non-randomized trial                                                                                                                                                       |
| Blinding of participants and personnel (performance bias) | High risk                 | Non-randomized trial                                                                                                                                                       |
| Blinding of outcome assessment (detection bias)           | High risk                 | Non-randomized trial                                                                                                                                                       |
| Incomplete outcome data (attrition bias)                  | Low risk                  | All dropouts accounted for and explained. Reasons for dropouts broadly due to either progression of disease or renal transplant. 11 drop outs due to side effects of drug. |
| Selective reporting (reporting bias)                      | Low risk                  | Data for whole follow up period published. Raw data supplied by author.                                                                                                    |
| Other bias                                                | Low risk                  | No funding from industry.                                                                                                                                                  |

| <b>Study Characteristics: Graham 1994</b> |                                               |
|-------------------------------------------|-----------------------------------------------|
| <b>Methods</b>                            | Clinical trial, not randomized                |
| <b>Participants</b>                       | 14 patients with AIDS, mean age 39, 100% male |
| <b>Interventions</b>                      | Megestrol acetate (800mg/day oral)            |

|                 |                                                                                                                                                                                                                                                                        |
|-----------------|------------------------------------------------------------------------------------------------------------------------------------------------------------------------------------------------------------------------------------------------------------------------|
| <b>Outcomes</b> | Weight<br>Plus: plasma drug levels                                                                                                                                                                                                                                     |
| <b>Notes</b>    | Length of treatment: 21 days<br>Data request: not required<br>Cachexia criteria: involuntary weight loss >10% baseline (since diagnosed with HIV infection)<br>Drop out rate: 0%<br>Time of analysis: 21 days<br>Aim of trial was to look at pharmacokinetics of drug. |

| <b>Risk of Bias: Graham 1994</b>                          |                           |                                                                  |
|-----------------------------------------------------------|---------------------------|------------------------------------------------------------------|
| <b>Bias</b>                                               | <b>Authors' judgement</b> | <b>Support for judgement</b>                                     |
| Random sequence generation (selection bias)               | High risk                 | Non-randomized trial                                             |
| Allocation concealment (selection bias)                   | High risk                 | Non-randomized trial                                             |
| Blinding of participants and personnel (performance bias) | High risk                 | Non-randomized trial                                             |
| Blinding of outcome assessment (detection bias)           | High risk                 | Non-randomized trial                                             |
| Incomplete outcome data (attrition bias)                  | High risk                 | Unclear why 4 patients not included in analysis (no explanation) |
| Selective reporting (reporting bias)                      | Low risk                  | All data published.                                              |
| Other bias                                                | Unclear risk              | Supported by Bristol Myers Squibb (manufacturer of MA)           |

| <b>Study Characteristics: Lien 1996</b> |                                                                                                                                                                                                              |
|-----------------------------------------|--------------------------------------------------------------------------------------------------------------------------------------------------------------------------------------------------------------|
| <b>Methods</b>                          | Pilot study, not randomized                                                                                                                                                                                  |
| <b>Participants</b>                     | 16 end stage renal failure on dialysis (peritoneal or haemodialysis), mean age 56, 63% male                                                                                                                  |
| <b>Interventions</b>                    | Megestrol acetate (20mg BD oral)                                                                                                                                                                             |
| <b>Outcomes</b>                         | Weight<br>Serum albumin<br>Plus: other nutritional parameters                                                                                                                                                |
| <b>Notes</b>                            | Length of treatment: at least 2 months<br>Data request: response - data no longer available<br>Cachexia criteria: serum albumin <3.5mg/dL for > 2 months<br>Drop out rate: 25%<br>Time of analysis: 2 months |

| <b>Risk of Bias: Lien 1996</b> |                           |                              |
|--------------------------------|---------------------------|------------------------------|
| <b>Bias</b>                    | <b>Authors' judgement</b> | <b>Support for judgement</b> |

|                                                           |              |                                                                |
|-----------------------------------------------------------|--------------|----------------------------------------------------------------|
| Random sequence generation (selection bias)               | High risk    | Non-randomized trial                                           |
| Allocation concealment (selection bias)                   | High risk    | Non-randomized trial                                           |
| Blinding of participants and personnel (performance bias) | High risk    | Non-randomized trial                                           |
| Blinding of outcome assessment (detection bias)           | High risk    | Non-randomized trial                                           |
| Incomplete outcome data (attrition bias)                  | Low risk     | All patients included in analysis.                             |
| Selective reporting (reporting bias)                      | High risk    | Mean follow up 4.3 months yet no data after 2 months reported. |
| Other bias                                                | Unclear risk | Funding source not stated.                                     |

| <b>Study Characteristics: Monfared 2009</b> |                                                                                                                                                                                                                                                                                                                                                                                          |
|---------------------------------------------|------------------------------------------------------------------------------------------------------------------------------------------------------------------------------------------------------------------------------------------------------------------------------------------------------------------------------------------------------------------------------------------|
| <b>Methods</b>                              | Randomized control trial, single blinded, placebo controlled*                                                                                                                                                                                                                                                                                                                            |
| <b>Participants</b>                         | 22 end stage renal failure on haemodialysis<br>a) 11 participants (9 completed), mean age 54<br>b) 11 participants (9 completed), mean age 60                                                                                                                                                                                                                                            |
| <b>Interventions</b>                        | 2 arm trial:<br>a) Megestrol acetate (40mg BD oral)<br>b) Current treatment, no placebo                                                                                                                                                                                                                                                                                                  |
| <b>Outcomes</b>                             | Weight<br>Serum albumin<br>Plus: other nutritional parameters                                                                                                                                                                                                                                                                                                                            |
| <b>Notes</b>                                | Length of treatment: 2 months<br>Quality score: 3<br>Data request: no response<br>Cachexia criteria: serum albumin <3.5mg/dL for 2 months<br>Drop out rate: 18%<br>Time of analysis: 2 months<br>This study was designed to look at serum albumin, weight was a secondary outcome and results not published.<br>* No 'placebo' actually given, comparison made to current treatment only |

| <b>Risk of Bias: Monfared 2009</b>                        |                           |                                                                                 |
|-----------------------------------------------------------|---------------------------|---------------------------------------------------------------------------------|
| <b>Bias</b>                                               | <b>Authors' judgement</b> | <b>Support for judgement</b>                                                    |
| Random sequence generation (selection bias)               | Unclear risk              | Method of randomization not stated. Unclear if baseline characteristics matched |
| Allocation concealment (selection bias)                   | Unclear risk              | Method of randomization not stated                                              |
| Blinding of participants and personnel (performance bias) | High risk                 | Participants and staff not blinded                                              |
| Blinding of outcome assessment (detection bias)           | Low risk                  | Analysis of outcome data blinded                                                |

|                                          |              |                                                                                                                                                                  |
|------------------------------------------|--------------|------------------------------------------------------------------------------------------------------------------------------------------------------------------|
| Incomplete outcome data (attrition bias) | Unclear risk | 4 dropouts. 3 deaths (2 in control group, 1 in intervention group), 1 kidney transplant. Causes of death not stated, but unlikely to be related to intervention. |
| Selective reporting (reporting bias)     | Low risk     | Weight data not published (but not primary outcome of study).                                                                                                    |
| Other bias                               | Unclear risk | Funding source not stated.                                                                                                                                       |

| <b>Study Characteristics: Mulligan 2007</b> |                                                                                                                                                                                                                                                                                                                                                                  |
|---------------------------------------------|------------------------------------------------------------------------------------------------------------------------------------------------------------------------------------------------------------------------------------------------------------------------------------------------------------------------------------------------------------------|
| <b>Methods</b>                              | Randomized control trial, double blind, placebo controlled*                                                                                                                                                                                                                                                                                                      |
| <b>Participants</b>                         | 79 HIV positive patients<br>a. 41 participants (37 completed), mean age 37, 100% male<br>b. 38 participants (29 completed) mean age 39, 100% male                                                                                                                                                                                                                |
| <b>Interventions</b>                        | 2 arm trial:<br>a. Megestrol acetate (800mg/day) with testosterone enanthane (200mg IM injection once every 2 weeks) - MA/TE<br>b. megestrol acetate (800mg/day) with placebo (IM injection once every 2 weeks) - MA/PL                                                                                                                                          |
| <b>Outcomes</b>                             | Weight<br>LBM (bioelectrical impedance analysis)<br>Plus: dietary intake, adrenal and gonadal function, sexual function                                                                                                                                                                                                                                          |
| <b>Notes</b>                                | Length of treatment: 12 weeks<br>Quality score: 3<br>Data request: raw data provided by author<br>Cachexia criteria: weight loss $\geq$ 5% usual body weight or BMI <20<br>Drop out rate: 16%<br>Time of analysis: 6 weeks, 12 weeks<br>This study was designed to look at the addition of adding testosterone to MA therapy (thus *placebo was MA with placebo) |

| <b>Risk of Bias: Mulligan 2007</b>                        |                           |                                                                                                                                                                                                       |
|-----------------------------------------------------------|---------------------------|-------------------------------------------------------------------------------------------------------------------------------------------------------------------------------------------------------|
| <b>Bias</b>                                               | <b>Authors' judgement</b> | <b>Support for judgement</b>                                                                                                                                                                          |
| Random sequence generation (selection bias)               | Unclear risk              | Permuted blocks method used. Baseline characteristics not matched.                                                                                                                                    |
| Allocation concealment (selection bias)                   | Unclear risk              | Unclear if allocation sequence concealed                                                                                                                                                              |
| Blinding of participants and personnel (performance bias) | Unclear risk              | Method of blinding not stated                                                                                                                                                                         |
| Blinding of outcome assessment (detection bias)           | Unclear risk              | Method of blinding not stated                                                                                                                                                                         |
| Incomplete outcome data (attrition bias)                  | High risk                 | 7 patients in MA group completed trial but were not included in analysis due 'to missing data' (all in MA/TE group). 4 patients withdrew due to 'adverse events' (1 MA/TE, 3 MA/PL) - no more detail. |

|                                      |              |                                                                                                                                               |
|--------------------------------------|--------------|-----------------------------------------------------------------------------------------------------------------------------------------------|
| Selective reporting (reporting bias) | High risk    | Very little raw data published. Weight and LBM data given as medians with interquartile range (? skewed data) - therefore not used in review. |
| Other bias                           | Unclear risk | Multiple writers had consulting fees and grant support from Bristol Myers Squibb                                                              |

| <b>Study Characteristics: Mwamburi 2004</b> |                                                                                                                                                                                                                  |
|---------------------------------------------|------------------------------------------------------------------------------------------------------------------------------------------------------------------------------------------------------------------|
| <b>Methods</b>                              | Randomized control trial, not blinded, no control                                                                                                                                                                |
| <b>Participants</b>                         | 39 HIV positive patients<br>a) 20 participants (18 completed), mean age 41, 65% male<br>b) 19 participants (15 completed), mean age 39, 84% male                                                                 |
| <b>Interventions</b>                        | 2 arm trial:<br>a) Megestrol acetate (800mg/day oral) with nutrition counseling<br>b) Oxandrolone 10mg BD with nutrition counseling                                                                              |
| <b>Outcomes</b>                             | Weight<br>LBM (bioelectrical impedance analysis and anthropometric measurements)<br>HRQL: SF12 questionnaire (physical and mental component)<br>Serum albumin<br>Plus: dietary intake, HIV RNA levels            |
| <b>Notes</b>                                | Length of treatment: 2 months<br>Quality score: 3<br>Data request: unable to contact author<br>Cachexia criteria: weight loss >5% body weight in last 6/12<br>Drop out rate: 12.5%<br>Time of analysis: 2 months |

| <b>Risk of Bias: Mwamburi 2004</b>                        |                           |                                                                                          |
|-----------------------------------------------------------|---------------------------|------------------------------------------------------------------------------------------|
| <b>Bias</b>                                               | <b>Authors' judgement</b> | <b>Support for judgement</b>                                                             |
| Random sequence generation (selection bias)               | Low risk                  | Computer generated random numbers. Matched baseline characteristics.                     |
| Allocation concealment (selection bias)                   | Unclear risk              | Not clear if allocation sequence concealed                                               |
| Blinding of participants and personnel (performance bias) | High risk                 | Not blinded                                                                              |
| Blinding of outcome assessment (detection bias)           | High risk                 | Not blinded                                                                              |
| Incomplete outcome data (attrition bias)                  | Low risk                  | 5 dropouts - precise reasons for each not implicitly stated, but adverse rates reported. |
| Selective reporting (reporting bias)                      | Low risk                  | No concerns                                                                              |
| Other bias                                                | Unclear risk              | Bristol Myers Squibb one of the funding sources.                                         |

| <b>Study Characteristics: Mwamburi 2004a</b> |                                |
|----------------------------------------------|--------------------------------|
| <b>Methods</b>                               | Clinical trial, not randomized |

|                      |                                                                                                                                                                                                                                                                                                                                                              |
|----------------------|--------------------------------------------------------------------------------------------------------------------------------------------------------------------------------------------------------------------------------------------------------------------------------------------------------------------------------------------------------------|
| <b>Participants</b>  | 29 HIV positive patients, mean age 40, 74% male                                                                                                                                                                                                                                                                                                              |
| <b>Interventions</b> | Megestrol acetate (800mg/day oral) plus Oxandrolone (10mg BD) plus nutrition counseling                                                                                                                                                                                                                                                                      |
| <b>Outcomes</b>      | Weight<br>LBM (bioelectrical impedance analysis and anthropometric measurements)<br>HRQL: SF12 questionnaire (physical and mental component)<br>Serum albumin<br>Plus: dietary intake, HIV RNA levels                                                                                                                                                        |
| <b>Notes</b>         | Length of treatment: 2 months either MA plus nutrition counseling or Oxandrolone plus nutrition counseling, then 5 months of all 3 therapies<br>Data request: no response<br>Cachexia criteria: weight loss >5% body weight in last 6/12<br>Drop out rate: 26%<br>Time of analysis: 7 months<br>Same patients as Mwamburi 2004 - extension of previous study |

| <b>Risk of Bias: Mwamburi 2004a</b>                       |                           |                                                  |
|-----------------------------------------------------------|---------------------------|--------------------------------------------------|
| <b>Bias</b>                                               | <b>Authors' judgement</b> | <b>Support for judgement</b>                     |
| Random sequence generation (selection bias)               | High risk                 | Non-randomized trial                             |
| Allocation concealment (selection bias)                   | High risk                 | Non-randomized trial                             |
| Blinding of participants and personnel (performance bias) | High risk                 | Non-randomized trial                             |
| Blinding of outcome assessment (detection bias)           | High risk                 | Non-randomized trial                             |
| Incomplete outcome data (attrition bias)                  | Unclear risk              | 5 dropouts - no explanation given.               |
| Selective reporting (reporting bias)                      | Unclear risk              | 2 published studies using the same patients.     |
| Other bias                                                | Unclear risk              | Bristol Myers Squibb one of the funding sources. |

| <b>Study Characteristics: Rammohan 2005</b> |                                                                                                                                                                                                                                                                                                                                     |
|---------------------------------------------|-------------------------------------------------------------------------------------------------------------------------------------------------------------------------------------------------------------------------------------------------------------------------------------------------------------------------------------|
| <b>Methods</b>                              | Clinical trial, not randomized                                                                                                                                                                                                                                                                                                      |
| <b>Participants</b>                         | 16 end stage renal failure on peritoneal dialysis or haemodialysis (data published only for the 10 patients whom completed the trial), mean age 60, 40% male                                                                                                                                                                        |
| <b>Interventions</b>                        | Megestrol acetate (400mg/day oral)                                                                                                                                                                                                                                                                                                  |
| <b>Outcomes</b>                             | Weight<br>Appetite (part of kidney disease and quality of life questionnaire (version 1.2) - SF36)<br>LBM (measurement published = fat free mass, bioelectrical impedance analysis)<br>HRQOL (kidney disease and quality of life questionnaire (version 1.2) - SF36)<br>Serum albumin<br>Plus: dietary intake, serum leptin and CRP |

|              |                                                                                                                                                                                                                                                                                                                                                                                                                     |
|--------------|---------------------------------------------------------------------------------------------------------------------------------------------------------------------------------------------------------------------------------------------------------------------------------------------------------------------------------------------------------------------------------------------------------------------|
| <b>Notes</b> | <p>Length of treatment: 16 weeks<br/> Data request: unable to contact<br/> Cachexia criteria: actual body weight &lt; 85% IBW or BMI &lt;20 with at least 1 of following (recent unplanned weight loss &gt;5-10% of their target weight within a 6/12 period not cause by evident intercurrent illness, serum albumin &lt;3.7 for 3 consecutive months)<br/> Drop out rate: 38%<br/> Time of analysis: 16 weeks</p> |
|--------------|---------------------------------------------------------------------------------------------------------------------------------------------------------------------------------------------------------------------------------------------------------------------------------------------------------------------------------------------------------------------------------------------------------------------|

| <b>Risk of Bias: Rammohan 2005</b>                        |                           |                                             |
|-----------------------------------------------------------|---------------------------|---------------------------------------------|
| <b>Bias</b>                                               | <b>Authors' judgement</b> | <b>Support for judgement</b>                |
| Random sequence generation (selection bias)               | High risk                 | Non-randomized trial                        |
| Allocation concealment (selection bias)                   | High risk                 | Non-randomized trial                        |
| Blinding of participants and personnel (performance bias) | High risk                 | Non-randomized trial                        |
| Blinding of outcome assessment (detection bias)           | High risk                 | Non-randomized trial                        |
| Incomplete outcome data (attrition bias)                  | Low risk                  | All dropouts accounted for.                 |
| Selective reporting (reporting bias)                      | Low risk                  | No concerns.                                |
| Other bias                                                | Unclear risk              | Bristol Myers Squibb one of trial sponsors. |

| <b>Study Characteristics: Rochon 2003</b> |                                                                                                                                                                                                                                                                                                              |
|-------------------------------------------|--------------------------------------------------------------------------------------------------------------------------------------------------------------------------------------------------------------------------------------------------------------------------------------------------------------|
| <b>Methods</b>                            | Randomized control trial, double blind, no placebo                                                                                                                                                                                                                                                           |
| <b>Participants</b>                       | <p>12 patients with HIV<br/> a) 6 participants, mean age 36, 100% male<br/> b) 6 participants, mean age 44, 100% male</p>                                                                                                                                                                                    |
| <b>Interventions</b>                      | <p>2 arm trial:<br/> a) Medroxyprogesterone acetate (400mg/day oral) plus nutritional advice, amino acid supplementation and protein supplementation<br/> b) Placebo plus nutritional advice, amino acid supplementation and protein supplementation</p>                                                     |
| <b>Outcomes</b>                           | <p>Weight<br/> LBM (anthropometric measurements)<br/> Serum albumin<br/> Plus: plasma tryptophan, amino acid levels, plasma substrate levels (e.g. insulin, glucose)</p>                                                                                                                                     |
| <b>Notes</b>                              | <p>Length of treatment: 5 weeks of nutritional supplementation, medroxyprogesterone/placebo given in the last 3 weeks<br/> Data request: no response<br/> Cachexia criteria: weight loss (not further specified)<br/> Drop out rate: 0%<br/> Time of analysis: 5 weeks<br/> No defined cachexia criteria</p> |

| <b>Risk of Bias: Rochon 2003</b>                          |                           |                                                                       |
|-----------------------------------------------------------|---------------------------|-----------------------------------------------------------------------|
| <b>Bias</b>                                               | <b>Authors' judgement</b> | <b>Support for judgement</b>                                          |
| Random sequence generation (selection bias)               | Unclear risk              | Method of randomization not stated. Matched baseline characteristics. |
| Allocation concealment (selection bias)                   | Unclear risk              | Method of randomization not stated                                    |
| Blinding of participants and personnel (performance bias) | Unclear risk              | Method of blinding not stated                                         |
| Blinding of outcome assessment (detection bias)           | Unclear risk              | Method of blinding not stated                                         |
| Incomplete outcome data (attrition bias)                  | Low risk                  | All patients included in analysis                                     |
| Selective reporting (reporting bias)                      | Low risk                  | No concerns                                                           |
| Other bias                                                | Low risk                  | No commercial sponsor (charitable)                                    |

| <b>Study Characteristics: Summerbell 1992</b> |                                                                                                                                                                                                      |
|-----------------------------------------------|------------------------------------------------------------------------------------------------------------------------------------------------------------------------------------------------------|
| <b>Methods</b>                                | Randomized control trial, not blinded, no placebo                                                                                                                                                    |
| <b>Participants</b>                           | 14 patient with HIV<br>a) 7 participants, no baseline characteristics published<br>b) 7 participants, no baseline characteristics published                                                          |
| <b>Interventions</b>                          | 2 arms:<br>a) Megestrol acetate (40mg/day oral, 'increased by 40mg daily on alternate weeks to a maximum dose of 160mg/day if there was no response in weight')<br>b) Cyproheptadine (12mg/day oral) |
| <b>Outcomes</b>                               | Weight<br>plus: dietary intake, sexual function questionnaires                                                                                                                                       |
| <b>Notes</b>                                  | Length of treatment: 3 months<br>Quality score: 1<br>Data request: unable to contact author<br>Cachexia criteria: weight loss >5kg body weight<br>Drop out rate: 7%<br>Time of analysis: 3 months    |

| <b>Risk of Bias: Summerbell 1992</b>                      |                           |                                                                                          |
|-----------------------------------------------------------|---------------------------|------------------------------------------------------------------------------------------|
| <b>Bias</b>                                               | <b>Authors' judgement</b> | <b>Support for judgement</b>                                                             |
| Random sequence generation (selection bias)               | High risk                 | 'simple randomization' - no further information. Baseline characteristics not published. |
| Allocation concealment (selection bias)                   | High risk                 | No information given                                                                     |
| Blinding of participants and personnel (performance bias) | High risk                 | Not blinded                                                                              |
| Blinding of outcome assessment (detection bias)           | High risk                 | Not blinded                                                                              |

|                                          |           |                                                        |
|------------------------------------------|-----------|--------------------------------------------------------|
| Incomplete outcome data (attrition bias) | High risk | All patients included in analysis.                     |
| Selective reporting (reporting bias)     | Low risk  | Some data presented in graphical form with no raw data |
| Other bias                               | High risk | Funding source not stated.                             |

| <b>Study Characteristics: Timpone 1997</b> |                                                                                                                                                                                                                                                                                                                                                                                                                       |
|--------------------------------------------|-----------------------------------------------------------------------------------------------------------------------------------------------------------------------------------------------------------------------------------------------------------------------------------------------------------------------------------------------------------------------------------------------------------------------|
| <b>Methods</b>                             | Randomized control trial, not blinded, no placebo                                                                                                                                                                                                                                                                                                                                                                     |
| <b>Participants</b>                        | 50 patients with HIV<br>a) 12 participants (7 completed), mean age 39, 83% male<br>b) 12 participants (10 completed), mean age 46, 83% male<br>c) 13 participants (11 completed), mean age 38, 92% male<br>d) 13 participants (12 completed), mean age 40, 92% male                                                                                                                                                   |
| <b>Interventions</b>                       | 4 arm trial:<br>a) Dronabinol 2.5mg BD oral<br>b) Megestrol acetate 750mg/day oral<br>c) Megestrol acetate 750mg/day oral plus Dronabinol 2.5mg BD oral<br>d) Megestrol acetate 250mg/day oral plus Dronabinol 2.5mg/day oral                                                                                                                                                                                         |
| <b>Outcomes</b>                            | Weight<br>Appetite (Visual Analogue Scale for Hunger/ VASH questionnaire)<br>HRQOL (Visual Analogue Scale for Mood/VASM questionnaire)<br>Plus: pharmacokinetic drug levels                                                                                                                                                                                                                                           |
| <b>Notes</b>                               | Length of treatment: 12 weeks<br>Quality score: 2<br>Data request: unable to contact author<br>Cachexia criteria: clinical diagnosis of 'HIV wasting syndrome' with $\geq 10\%$ weight loss and/or low BMI ( $\leq 20.5\text{kg/m}^2$ for age 18-34 or $\leq 22.5\text{kg/m}^2$ for age $\geq 35$ years)<br>Drop out rate: 20%<br>Time of analysis: 12 weeks<br>Study designed to look at safety and pharmacokinetics |

| <b>Risk of Bias: Timpone 1997</b>                         |                           |                                                                       |
|-----------------------------------------------------------|---------------------------|-----------------------------------------------------------------------|
| <b>Bias</b>                                               | <b>Authors' judgement</b> | <b>Support for judgement</b>                                          |
| Random sequence generation (selection bias)               | Unclear risk              | Method of randomization not stated. Matched baseline characteristics. |
| Allocation concealment (selection bias)                   | Unclear risk              | Method of randomization not stated                                    |
| Blinding of participants and personnel (performance bias) | High risk                 | Not blinded                                                           |
| Blinding of outcome assessment (detection bias)           | High risk                 | Not blinded                                                           |
| Incomplete outcome data (attrition bias)                  | Low risk                  | Dropouts fully explained                                              |
| Selective reporting (reporting bias)                      | Low risk                  | No concerns                                                           |
| Other bias                                                | Low risk                  | No commercial sponsors                                                |

| <b>Study Characteristics: Von Roenn 1990</b> |                                                                                                                                                                                                                                                                                                             |
|----------------------------------------------|-------------------------------------------------------------------------------------------------------------------------------------------------------------------------------------------------------------------------------------------------------------------------------------------------------------|
| <b>Methods</b>                               | Pilot study (open trial), not randomized                                                                                                                                                                                                                                                                    |
| <b>Participants</b>                          | 22 patients with HIV, limited baseline characteristics                                                                                                                                                                                                                                                      |
| <b>Interventions</b>                         | Megestrol acetate 80mg QDS oral                                                                                                                                                                                                                                                                             |
| <b>Outcomes</b>                              | Weight<br>Appetite<br>HRQOL (sense of wellbeing - method not stated)<br>Plus: sexual function questionnaire                                                                                                                                                                                                 |
| <b>Notes</b>                                 | Length of treatment: 2-72 weeks (open trial)<br>Data request: no response<br>Cachexia criteria: weight loss >10% pre-illness body weight and losing weight at time of enrolment<br>Drop out rate: open trial<br>Time of analysis: unclear<br>14 patients previously reported in Van Roenn 1988 (same trial) |

| <b>Risk of Bias: Von Roenn 1990</b>                       |                           |                                                                                      |
|-----------------------------------------------------------|---------------------------|--------------------------------------------------------------------------------------|
| <b>Bias</b>                                               | <b>Authors' judgement</b> | <b>Support for judgement</b>                                                         |
| Random sequence generation (selection bias)               | High risk                 | Non-randomized trial                                                                 |
| Allocation concealment (selection bias)                   | High risk                 | Non-randomized trial                                                                 |
| Blinding of participants and personnel (performance bias) | High risk                 | Non-randomized trial                                                                 |
| Blinding of outcome assessment (detection bias)           | High risk                 | Non-randomized trial                                                                 |
| Incomplete outcome data (attrition bias)                  | High risk                 | Reasons for withdrawal not stated clearly.                                           |
| Selective reporting (reporting bias)                      | Low risk                  | Raw data clearly presented.                                                          |
| Other bias                                                | Unclear risk              | Source of funding not stated. Results for 14 patients in same trial published twice. |

| <b>Study Characteristics: Von Roenn 1994</b> |                                                                                                                                                                                                                                                                        |
|----------------------------------------------|------------------------------------------------------------------------------------------------------------------------------------------------------------------------------------------------------------------------------------------------------------------------|
| <b>Methods</b>                               | Randomized control trial, double blind, placebo controlled                                                                                                                                                                                                             |
| <b>Participants</b>                          | 270 patients with AIDS (75 dropouts - not stated how many in each arm of trial)<br>a) 82 participants, mean age 39, 99% male<br>b) 75 participants, mean age 39, 100% male<br>c) 75 participants, mean age 38, 100% male<br>d) 38 participants, mean age 38, 100% male |
| <b>Interventions</b>                         | 4 arm trial:<br>a) Megestrol acetate 100mg/day oral<br>b) Megestrol acetate 400mg/day oral<br>c) Megestrol acetate 800mg/day oral<br>d) Placebo (no further information)                                                                                               |

|                 |                                                                                                                                                                                                                                            |
|-----------------|--------------------------------------------------------------------------------------------------------------------------------------------------------------------------------------------------------------------------------------------|
| <b>Outcomes</b> | Weight<br>Appetite<br>LBM (bioelectrical impedance analysis and anthropometric measurements)<br>HRQOL (sense of wellbeing - nine item linear analogue and self assessment questionnaire)<br>Plus: dietary intake, opportunistic infections |
| <b>Notes</b>    | Length of treatment: 12 weeks<br>Quality score: 3<br>Data request: no response<br>Cachexia criteria: clinically significant weight loss (>20% usual body weight), or 10% below IBW<br>Drop out rate: 28%<br>Time of analysis: 12 weeks     |

| <b>Risk of Bias: Von Roenn 1994</b>                       |                           |                                                                                                           |
|-----------------------------------------------------------|---------------------------|-----------------------------------------------------------------------------------------------------------|
| <b>Bias</b>                                               | <b>Authors' judgement</b> | <b>Support for judgement</b>                                                                              |
| Random sequence generation (selection bias)               | Unclear risk              | Method of randomization not stated. Matched baseline characteristics.                                     |
| Allocation concealment (selection bias)                   | Unclear risk              | Method of randomization not stated                                                                        |
| Blinding of participants and personnel (performance bias) | Unclear risk              | Method of blinding not stated. Form of placebo not published (? tablet form)                              |
| Blinding of outcome assessment (detection bias)           | Unclear risk              | Method of blinding not stated                                                                             |
| Incomplete outcome data (attrition bias)                  | High risk                 | Unclear how many dropouts were from each arm of trial. No CONSORT flow diagram of patients through study. |
| Selective reporting (reporting bias)                      | Low risk                  | Data clearly reported                                                                                     |
| Other bias                                                | Unclear risk              | Supported by Bristol Myers Squibb (manufacturer of MA)                                                    |

| <b>Study Characteristics: Wanke 2007</b> |                                                                                                                                                                                                                          |
|------------------------------------------|--------------------------------------------------------------------------------------------------------------------------------------------------------------------------------------------------------------------------|
| <b>Methods</b>                           | Randomized control trial, not blinded, no placebo                                                                                                                                                                        |
| <b>Participants</b>                      | 63 patients with HIV<br>a) 32 participants, mean age 37, 66% male<br>b) 31 participants, mean age 36, 48% male                                                                                                           |
| <b>Interventions</b>                     | 2 arm trial:<br>a) Megestrol acetate concentrated suspension 575mg/day oral<br>b) Megestrol acetate oral suspension 800mg/day oral                                                                                       |
| <b>Outcomes</b>                          | Weight<br>Appetite<br>LBM (anthropometric measurements)<br>HRQOL (Bristol Myers Anorexia/Cachexia Recovery Instrument/BACRI, plus Hamilton rating scale for depression/HAMD-17)<br>Serum albumin<br>Plus: serum cortisol |

|              |                                                                                                                                                                                                                                                                                                                    |
|--------------|--------------------------------------------------------------------------------------------------------------------------------------------------------------------------------------------------------------------------------------------------------------------------------------------------------------------|
| <b>Notes</b> | Length of treatment: 12 weeks<br>Quality score: 3<br>Data request: no response<br>Cachexia criteria: weight loss >10% body weight or weight <90% ideal body weight<br>Drop out rate: 7%<br>Time of analysis: 12 weeks<br>Study designed to compare efficacy of different strengths of Megestrol acetate suspension |
|--------------|--------------------------------------------------------------------------------------------------------------------------------------------------------------------------------------------------------------------------------------------------------------------------------------------------------------------|

| <b>Risk of Bias: Wanke 2007</b>                           |                           |                                                                                                    |
|-----------------------------------------------------------|---------------------------|----------------------------------------------------------------------------------------------------|
| <b>Bias</b>                                               | <b>Authors' judgement</b> | <b>Support for judgement</b>                                                                       |
| Random sequence generation (selection bias)               | Low risk                  | 'Randomized 1:1 from a central site with block size 2'. Matched baseline characteristics.          |
| Allocation concealment (selection bias)                   | Low risk                  | 'Randomized 1:1 from a central site with block size 2'                                             |
| Blinding of participants and personnel (performance bias) | High risk                 | Not blinded                                                                                        |
| Blinding of outcome assessment (detection bias)           | High risk                 | Not blinded                                                                                        |
| Incomplete outcome data (attrition bias)                  | Low risk                  | 5 dropouts due to 'adverse events' - no further information. Equally distributed between 2 groups. |
| Selective reporting (reporting bias)                      | Low risk                  | No concerns                                                                                        |
| Other bias                                                | Unclear risk              | Funding source not stated but likely Bristol Myers Squibb (use their assessment tools)             |

| <b>Study Characteristics: Weisberg 2002</b> |                                                                                                                                                                                             |
|---------------------------------------------|---------------------------------------------------------------------------------------------------------------------------------------------------------------------------------------------|
| <b>Methods</b>                              | Randomized control trial, double blind, placebo controlled                                                                                                                                  |
| <b>Participants</b>                         | 145 patients with COPD<br>a) 72 participants, mean age 68, 64% male<br>b) 73 participants, mean age 66, 62% male                                                                            |
| <b>Interventions</b>                        | 2 arm trial:<br>a) Megestrol acetate 800mg/day oral<br>b) Placebo (inert oral suspension)                                                                                                   |
| <b>Outcomes</b>                             | Weight<br>Appetite<br>LBM (anthropometric measurements)<br>HRQOL (9 item questionnaire)<br>Serum albumin<br>Plus: respiratory muscle strength, ABG levels, subjective perception of disease |
| <b>Notes</b>                                | Length of treatment: 8 weeks<br>Quality score: 3<br>Data request: no response<br>Cachexia criteria: <95% ideal body weight<br>Drop out rate: 12%<br>Time of analysis: 8 weeks               |

| <b>Risk of Bias: Weisberg 2002</b>                        |                           |                                                                       |
|-----------------------------------------------------------|---------------------------|-----------------------------------------------------------------------|
| <b>Bias</b>                                               | <b>Authors' judgement</b> | <b>Support for judgement</b>                                          |
| Random sequence generation (selection bias)               | Unclear risk              | Method of randomization not stated. Matched baseline characteristics. |
| Allocation concealment (selection bias)                   | Unclear risk              | Method of randomization not stated                                    |
| Blinding of participants and personnel (performance bias) | Unclear risk              | Method of blinding not stated                                         |
| Blinding of outcome assessment (detection bias)           | Unclear risk              | Method of blinding not stated                                         |
| Incomplete outcome data (attrition bias)                  | Low risk                  | Reasons for dropouts well explained.                                  |
| Selective reporting (reporting bias)                      | Low risk                  | Raw data published                                                    |
| Other bias                                                | Unclear risk              | Funding source not stated                                             |

| <b>Study Characteristics: Yeh 2000</b> |                                                                                                                                                                                                                                                                      |
|----------------------------------------|----------------------------------------------------------------------------------------------------------------------------------------------------------------------------------------------------------------------------------------------------------------------|
| <b>Methods</b>                         | Randomized control trial, double blind, placebo controlled                                                                                                                                                                                                           |
| <b>Participants</b>                    | 69 nursing home residents with geriatric cachexia<br>a) 36 participants, mean age 76, 97% male<br>b) 33 participants, mean age 76, 94% male                                                                                                                          |
| <b>Interventions</b>                   | 2 arm trial:<br>a) Megestrol acetate 800mg/day oral<br>b) Placebo (20ml in identical containers with non-identifying labels)                                                                                                                                         |
| <b>Outcomes</b>                        | Weight<br>Appetite<br>LBM (measurement published = fat free mass by bioelectrical impedance analysis)<br>HRQOL (Depression score, enjoyment score)<br>Serum albumin<br>Plus: nutritional parameters, dietary intake                                                  |
| <b>Notes</b>                           | Length of treatment: 12 weeks<br>Quality score: 5<br>Data request: no response<br>Cachexia criteria: weight loss $\geq 5\%$ usual body weight over preceding 3 months or body weight 20% below ideal body weight<br>Drop out rate: 17%<br>Time of analysis: 12 weeks |

| <b>Risk of Bias: Yeh 2000</b>               |                           |                                                         |
|---------------------------------------------|---------------------------|---------------------------------------------------------|
| <b>Bias</b>                                 | <b>Authors' judgement</b> | <b>Support for judgement</b>                            |
| Random sequence generation (selection bias) | Low risk                  | Random numbers table. Matched baseline characteristics. |

|                                                           |              |                                                                                                                                                     |
|-----------------------------------------------------------|--------------|-----------------------------------------------------------------------------------------------------------------------------------------------------|
| Allocation concealment (selection bias)                   | Unclear risk | Unclear if allocation sequence concealed                                                                                                            |
| Blinding of participants and personnel (performance bias) | Low risk     | Double blinding method well explained                                                                                                               |
| Blinding of outcome assessment (detection bias)           | Low risk     | Double blinding method well explained                                                                                                               |
| Incomplete outcome data (attrition bias)                  | Unclear risk | Dropouts clearly explained, however 18 patients not included in analysis as 'violated entry criteria', and 2 dropouts due to 'lack of weight gain'. |
| Selective reporting (reporting bias)                      | Low risk     | No concerns. All outcome data clearly published.                                                                                                    |
| Other bias                                                | Unclear risk | Sponsored by Bristol Myer Squibb                                                                                                                    |

| <b>Study Characteristics: Yeh 2010</b> |                                                                                                                                                                                                                                                                                                            |
|----------------------------------------|------------------------------------------------------------------------------------------------------------------------------------------------------------------------------------------------------------------------------------------------------------------------------------------------------------|
| <b>Methods</b>                         | Randomized control trial, double blind, no placebo                                                                                                                                                                                                                                                         |
| <b>Participants</b>                    | 9 end stage renal failure on haemodialysis<br>a) 4 participants, mean age 67.5, 100% male<br>b) 5 participants, mean age 75.4, 100% male                                                                                                                                                                   |
| <b>Interventions</b>                   | 2 arms:<br>a) Megestrol acetate 800mg/day oral plus physical therapy<br>b) Placebo plus physical therapy                                                                                                                                                                                                   |
| <b>Outcomes</b>                        | Weight<br>Appetite (5 point Liket scale)<br>LBM (fat mass, bioelectrical impedance analysis)<br>HRQOL (sense of wellbeing questionnaire)<br>Serum albumin<br>Plus: ability to exercise, ability to perform ADLs, nutritional parameters and cytokine levels                                                |
| <b>Notes</b>                           | Length of treatment: 20 weeks<br>Quality score: 5<br>Data request: no response<br>Cachexia criteria: albumin <4, total cholesterol <150, protein catabolic rate (PCR) <0.8, pre-dialysis serum urea nitrogen >60<br>Drop out rate: 33%<br>Time of analysis: 24 weeks<br>9 enrolled, 6 included in analysis |

| <b>Risk of Bias: Yeh 2010</b>                             |                           |                                                         |
|-----------------------------------------------------------|---------------------------|---------------------------------------------------------|
| <b>Bias</b>                                               | <b>Authors' judgement</b> | <b>Support for judgement</b>                            |
| Random sequence generation (selection bias)               | Low risk                  | Random numbers table. Matched baseline characteristics. |
| Allocation concealment (selection bias)                   | Unclear risk              | Unclear if allocation sequence concealed                |
| Blinding of participants and personnel (performance bias) | Unclear risk              | On site statistician and pharmacist aware of allocation |
| Blinding of outcome assessment (detection bias)           | Unclear risk              | Not stated                                              |

|                                          |              |                                              |
|------------------------------------------|--------------|----------------------------------------------|
| Incomplete outcome data (attrition bias) | Low risk     | Dropouts accounted for an evenly distributed |
| Selective reporting (reporting bias)     | Low risk     | No concerns                                  |
| Other bias                               | Unclear risk | Sponsored by Bristol Myer Squibb             |
